# Supplementary material
Source: publisher figshare collection journal article supplement (https://karger.figshare.com/articles/dataset/_/20071892)
Supplement: Supplementary file 1 [file 1]

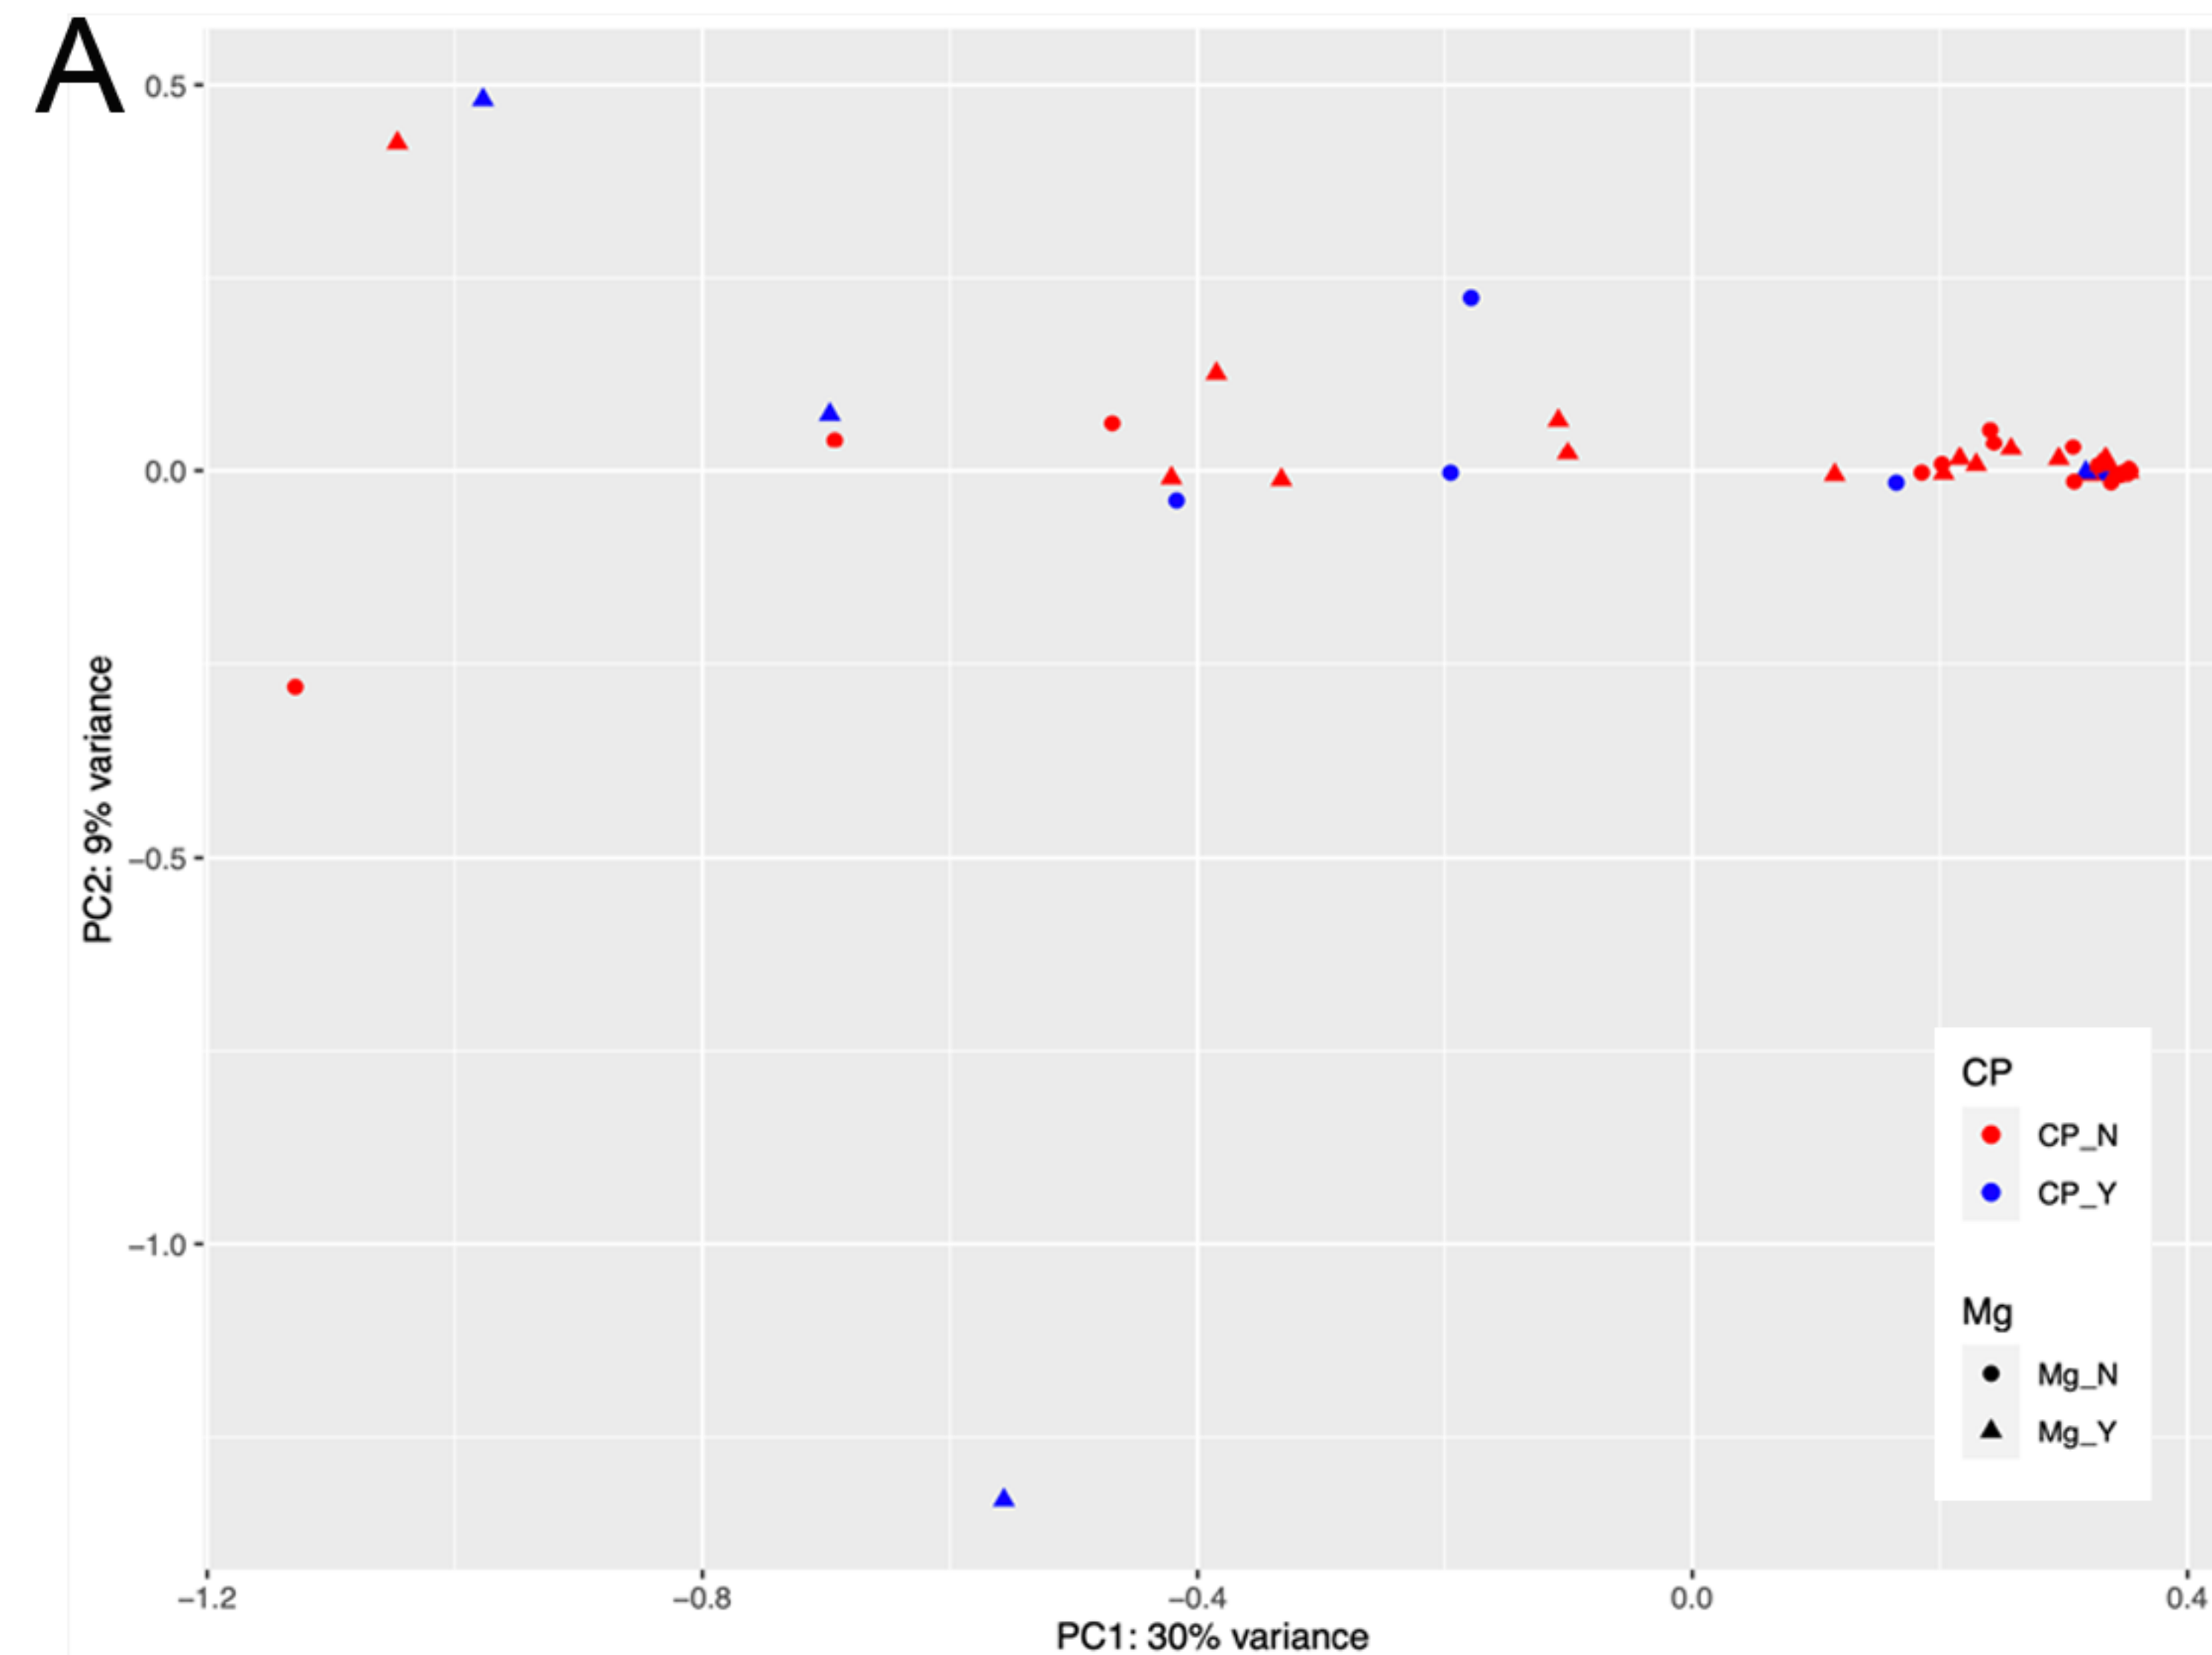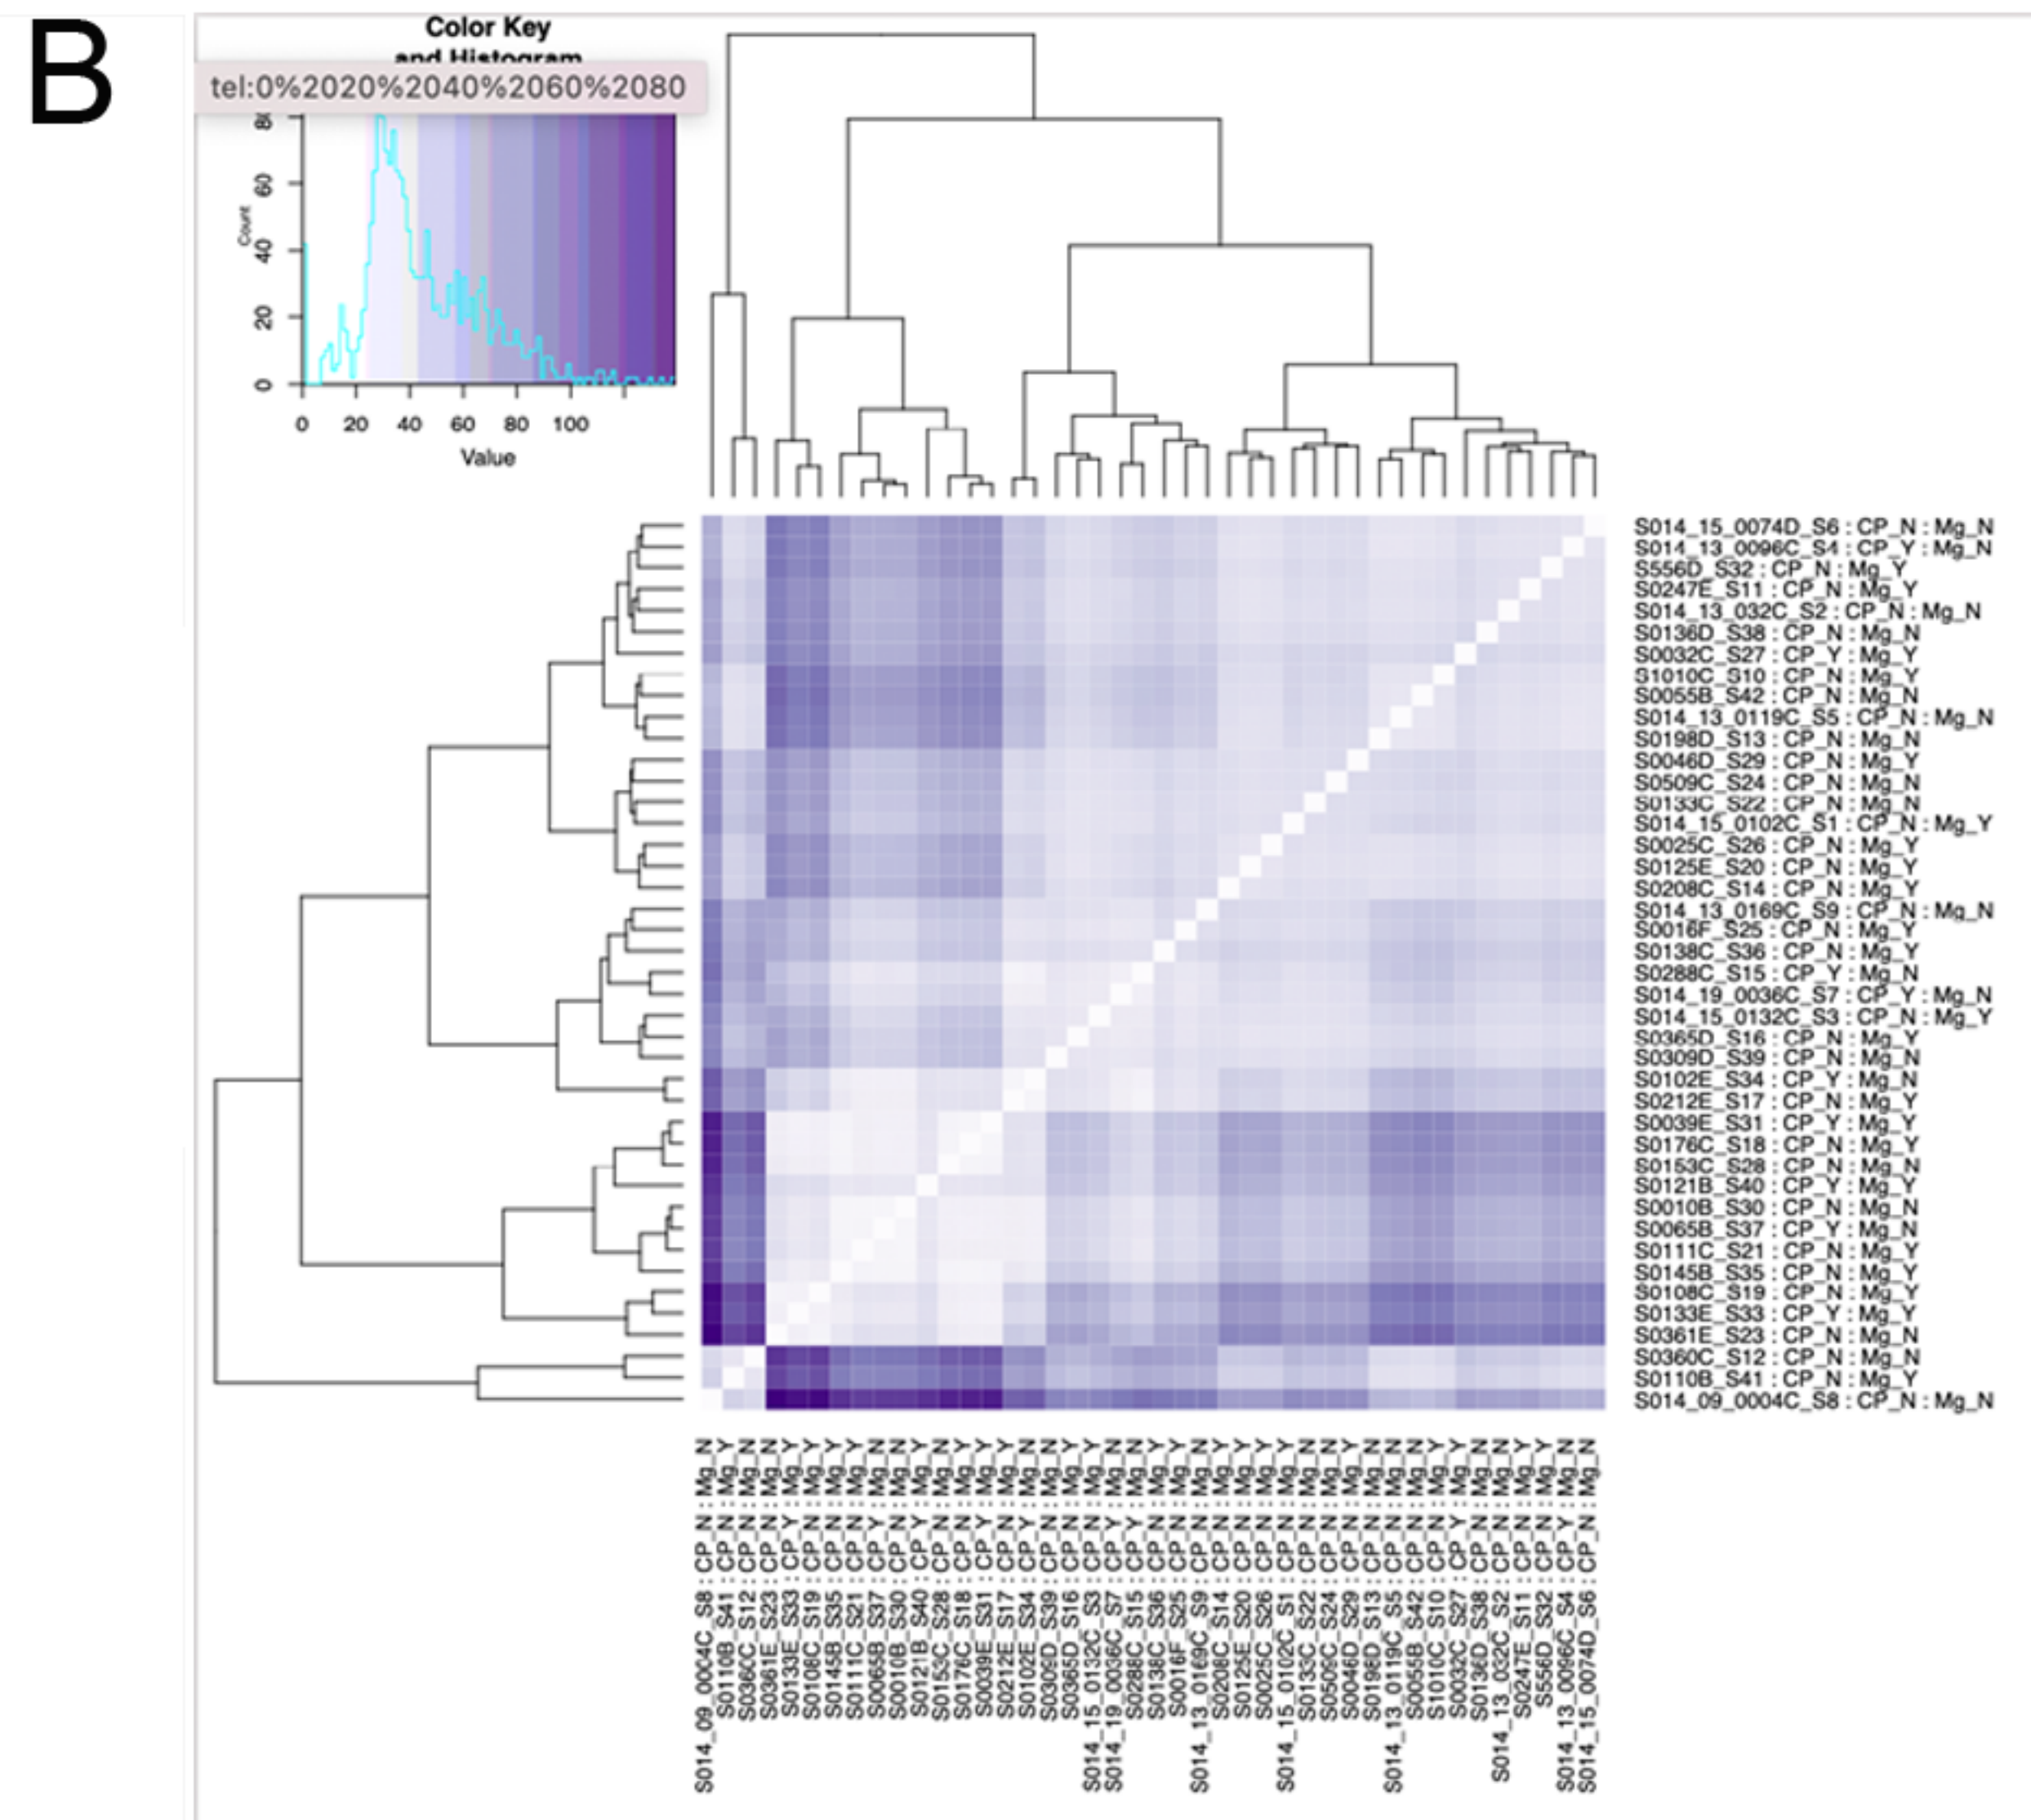

Supp Fig 1. A) PCA plot does not show obvious segregation of treatment groups. B) Dendrogram does not show obvious relationships between treatment groups.
